# Supplementary material for: Crisis Resource Management in the Delivery Room: Development of Behavioral Markers for Team Performance in Emergency Simulation
Source: MDPI journal article supplement (doi:10.3390/ijerph15030439), 2018-03-03
Supplement: s1 [file s1]

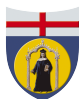

## 1. Know the environment

One of the prerequisites of the CRM is to know the available resources and the characteristics of the specific work environment. The resources can be human or instrumental. It is important to know who to call for help, who is available in the several moments of the day, how to quickly contact these people and how long they will take to arrive. Concerning tools and instruments, it is necessary to know if they are available, where they are located, and how to operate them.

## 2. Anticipate and plan

Anticipation is the key of a goal-oriented behavior. In order to anticipate effectively, it is first necessary to take into account the case characteristics and plan the main steps. Anticipation allows practitioners to explore potential threats and critical situations. It's a matter of thinking ahead.

## 3. Call for help early

Realizing that you are having a difficulty and promptly asking for help is sign of good professional behavior (prudence, diligence and skill). Some clues to understand when it is necessary to call for help could be: when there are too many things to do, when you feel losing control over the situation, when problems get worse or are not reduced by the procedures or actions taken, or when you have no idea of what is going on.

## 4. A. Exercise leadership and followership with assertiveness

A team needs a leader, someone to take care of the task organization, tasks distribution, data gathering, and decision making about the main aspects of the situation. Leadership does not mean knowing more than the others, doing everything by oneself or submitting other people. It is rather a capacity to plan, decide and distribute tasks with effective communication.

### B. Exercise followership with assertiveness

Followers are the key members of the team; they listen to the team leader and do what is necessary. That does not mean that they "turn their brain off": they should be able to sustain their point of view if they think their team leader is making a bad decision. They have the responsibility to make sure that the team leader takes into account their opinions and suggestions.

## 5. Distribute the workload

One of the main duties of the team leader is the distribution of workload. It is necessary that someone define the task to be accomplished and make sure that the tasks will be performed adequately. If possible, the team leader should be free from tasks to observe, gather information, and distribute activities. Every team member should be able to anticipate the leader requests, accomplishing tasks according to his/her competences. During emergencies, the team should to slow down and have a short brief about the situation in order to perform an effective planning, re-evaluation, and treatment.

## 6. Mobilize all available resources

Every resource, (human, technological, and organizational) that may help in coping with the problem should be taken into account and used. From the human point of view, the most relevant resources are the knowledge and skills of practitioners (together with the acknowledgement of one's own limit). Tools and instruments allow the translation of knowledge into action; some tools may be immediately available, while other need time to be mobilized.

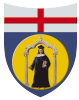

## 7. Communicate effectively—speak up

Good teamwork is based on all the team members being on the same wavelength and being able to coordinate the effort. Communication is the link between members. Communication is effective only when the message has been received and understood.

## 8. Use all available information

It is necessary to integrate all the available sources of information. For instance, integrate immediately available sources (e.g., monitor, medical file, exams, colleagues, the patient), secondary sources (e.g., consultancy with other colleagues), and external sources (e.g., algorithms, protocols, the Internet).

## 9. Prevent and manage fixation errors

Human actions are based on a mental model of the current situation: if the model of the situation is wrong, it is possible that the actions will be wrong as well. The fixation error occurs when we use an inadequate mental model, notwithstanding the presence of clues in the situation that suggest alternative paths and solutions. The fixation error consists in the reiteration of an action or a clinical thought without taking into account alternative actions or ideas, while clues in the situation suggest a revision of the problem. This kind of mistake is very frequent in dynamic situations.

## 10. Crosscheck and double-check (never assume anything)

Cross-checking means to integrate different sources of information and revise what has been already done or what is going to be done. In general, it is better to give nothing for granted, performing multiple checks on relevant information.

## 11. Use cognitive aids

Resources like checklists, manuals, calculators, tables, algorithms, and consultancies from other colleagues have the same function: they enable the clinical-diagnostic-therapeutic reasoning. Cognitive aids support memory and enable practitioners to notice critical elements, especially under stress. Cognitive aids also help in following the best practices and guidelines, because during a crisis people tend to use previously learned and well-established procedures, even when they are no more updated and in line with the current guidelines/recommendations.

## 12. Re-evaluate repeatedly

Emergency medicine is dynamic. What is correct in a given moment could be wrong a minute later. Some parameters may gradually change over time, and small changes may be hard to notice. Checking the trend of parameters could help to notice a slow but insidious change. In addition, it is necessary to continually re-evaluate the situation, since the critical events have a dynamic nature.

## 13. Use good teamwork—coordinate with and support others

A short briefing before starting the task is time well spent to make the team more effective. Every team member should constantly support and care for others in order to coordinate team activities.

## 14. Allocate attention wisely

Human attention is a limited resource and multitasking is very difficult. For this reason, attention should be dynamically managed according to the priorities. For example, the memory technique “ABC = Airways, Breathing, Circulation”, structured to distribute attention over time according to pre-defined sequences. Another strategy is to alternate the focus on the detail and on the global situation, delegating some activities to other qualified team members.

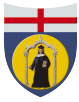

## 15. Set priorities dynamically

Dynamic situations require dynamic interventions. It is necessary to preliminarily set the priorities, while being able to constantly re-evaluate and modify them if necessary. What was wrong in a given moment may be the right thing to do in another moment. In addition, having a solution to a problem does not mean that it is the best solution or that there is only one way to solve it.

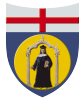

# CRM Observational tool

## Know the environment

Resources (tools, personnel, materials)...

are found and used  
when necessary

○ ○ ○ ○

are found after looking  
around or after asking  
where they were

## Anticipate and plan

The potential clinical  
complications are discussed...

in advance

○ ○ ○ ○

when they happen or  
are not discussed at all

## Call for help early

The request of medical and/or  
organizational resource supply is  
made...

as soon as the team  
members realize a  
problem has occurred

○ ○ ○ ○

some time after the  
problem has occurred

## Exercise leadership and followership with assertiveness

In the team...

someone is  
coordinating,  
assigning tasks,  
declaring the  
decisions

○ ○ ○ ○

nobody is coordinating,  
assigning tasks,  
declaring the decisions

In the team...

the leader encourages  
and supports the  
opinions of the other  
colleagues

○ ○ ○ ○

the others' opinions are  
ignored, trivialized or  
discouraged

The team members...

share opinions and  
personal points of  
view

○ ○ ○ ○

perform silently what  
required and do not  
express any personal  
opinion

## Distribute the workload

Task sharing is...

decided and  
communicated

○ ○ ○ ○

not clearly defined  
and/or communicated

## Mobilize all available resources

All the human, technological and  
organizational resources are...

assessed and required

○ ○ ○ ○

not required

## Communicate effectively—speak up

Communication is...

ordered and directed  
to specific members

○ ○ ○ ○

not addressed to  
specific members or  
chaotic (many people  
talking at the same  
time)

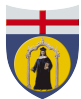

# CRM Observational tool

|                                       |                                                                                                                                                |         |                                                                                                  |
|---------------------------------------|------------------------------------------------------------------------------------------------------------------------------------------------|---------|--------------------------------------------------------------------------------------------------|
| The person who gets an instruction... | confirms the reception by rephrasing it                                                                                                        | ○ ○ ○ ○ | does not confirm its reception, or confirms without rephrasing it                                |
| Information is shared...              | in a complete way (e.g., request of drug administration specifying active principle, quantity, way of administration, time for administration) | ○ ○ ○ ○ | in a incomplete of imprecise way (e.g., request of drug administration specifying just its name) |

## Use all available information

|                             |                                                                                          |         |                                                         |
|-----------------------------|------------------------------------------------------------------------------------------|---------|---------------------------------------------------------|
| The situation is managed... | collecting information from the patient, the medical record, the protocols, and the team | ○ ○ ○ ○ | using just some of the available sources of information |
|-----------------------------|------------------------------------------------------------------------------------------|---------|---------------------------------------------------------|

## Prevent and manage fixation errors

|                                                                   |                                             |         |                   |
|-------------------------------------------------------------------|---------------------------------------------|---------|-------------------|
| When the clinical action does not provide the expected outcome... | alternative data and solutions are searched | ○ ○ ○ ○ | no change is done |
|-------------------------------------------------------------------|---------------------------------------------|---------|-------------------|

## Crosscheck and double-check

|                                                                                                                                |                |         |                                                    |
|--------------------------------------------------------------------------------------------------------------------------------|----------------|---------|----------------------------------------------------|
| The relevant data for the management of the situation (e.g., blood compatibility tests, drug administration procedures) are... | double-checked | ○ ○ ○ ○ | checked by a single operator or not checked at all |
|--------------------------------------------------------------------------------------------------------------------------------|----------------|---------|----------------------------------------------------|

## Use cognitive aids

|                                                                            |      |         |          |
|----------------------------------------------------------------------------|------|---------|----------|
| Checklists, manuals, tables, algorithms and/or expert consultations are... | used | ○ ○ ○ ○ | not used |
|----------------------------------------------------------------------------|------|---------|----------|

## Re-evaluate repeatedly

|                                                                                                                               |                           |         |                                                                                             |
|-------------------------------------------------------------------------------------------------------------------------------|---------------------------|---------|---------------------------------------------------------------------------------------------|
| Data useful for the management of the situation (clinical parameters, vital parameters on the monitors, etc.) are assessed... | explicitly and repeatedly | ○ ○ ○ ○ | only at the beginning of the scenario or re-evaluated without being explicitly communicated |
|-------------------------------------------------------------------------------------------------------------------------------|---------------------------|---------|---------------------------------------------------------------------------------------------|

## Use good teamwork

|                 |                                        |         |                                                            |
|-----------------|----------------------------------------|---------|------------------------------------------------------------|
| Team members... | cooperate, independently by their role | ○ ○ ○ ○ | work independently from each other and without mutual help |
|-----------------|----------------------------------------|---------|------------------------------------------------------------|



# CRM Observational tool

## Allocate attention wisely

Team members...

explicit both a global  
picture of the case,  
and specific aspects of  
the situation

○○○○

are focused only on  
specific aspects

## Set priorities dynamically

During the scenario...

priority re-evaluation  
is explicitly declared

○○○○

priorities are not re-  
evaluated
